# Supplementary material for: An isophorone-based far-red emitting ratiometric fluorescent probe for selective sensing and imaging of polysulfides
Source: Royal Society of Chemistry journal article supplement (doi:10.1039/c8tb01813h), 2018-01-01
Supplement: c8tb01813h1.pdf [file c8tb01813h1.pdf]

## Supporting Information

*for*

### **An Isophorone-based Far-red Emitting Ratiometric Fluorescent Probe for Selective Sensing and Imaging of Polysulfide**

Liming Zhao,<sup>†a,c</sup> Qian Sun,<sup>†d</sup> Chuanzhi Sun,<sup>b</sup> Changli Zhang,<sup>c\*</sup> Wenzeng Duan,<sup>a</sup> Shuwen Gong<sup>a\*</sup> and Zhipeng Liu<sup>d\*</sup>

<sup>a</sup> School of Chemistry and Chemical Engineering, Liaocheng University, 1 Hunan Road, Liaocheng, 252000, China. \*E-mail: [gongshw@lcu.edu.cn](mailto:gongshw@lcu.edu.cn).

<sup>b</sup> School of Chemistry & Chemical Engineering and Material Science, Shandong Normal University, 88 East Wenhua Road, Jinan, 250014, China.

<sup>c</sup> Nanjing Xiaozhuang college, 3601 Hongjing Road, Nanjing, 251171, China. E-mail: [changlizhang@njxzc.edu.cn](mailto:changlizhang@njxzc.edu.cn).

<sup>d</sup> Key Laboratory of Flexible Electronics (KLOFE) & Institute of Advanced Materials (IAM), Jiangsu National Synergetic Innovation Center for Advanced Materials (SICAM), Nanjing Tech University (NanjingTech), 30 South Puzhu Road, Nanjing, 211816, China. \*E-mail: [iamzpliu@njtech.edu.cn](mailto:iamzpliu@njtech.edu.cn).

<sup>†</sup> Both authors contribute equally to this work.

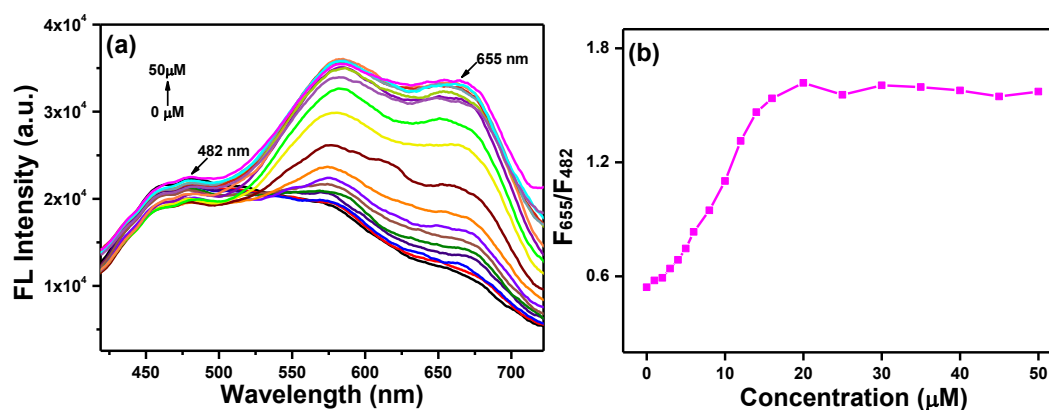

**Fig. S1.** (a) Emission spectra changes and (b) emission intensity ratio ( $F_{655}/F_{482}$ ) changes of **RPHS1** (5  $\mu\text{M}$ ) in the presence of increasing concentrations of  $\text{Na}_2\text{S}_2$  ( $\lambda_{\text{ex}} = 395 \text{ nm}$ , slit width =  $d_{\text{ex}} = d_{\text{em}} = 2 \text{ nm}$ , PMT voltage = 950 V) in DMSO/ phosphate buffer (3:97, v/v, 10 mM, pH 7.4, 0.4% Tween 80) at room temperature.

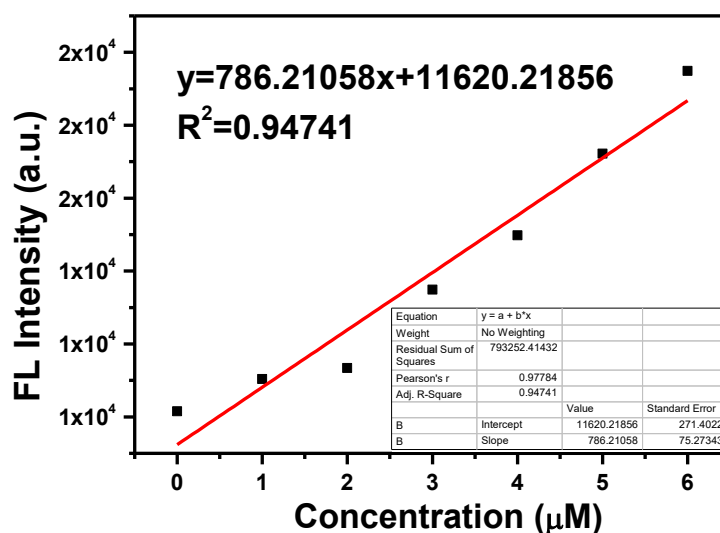

**Fig. S2.** Calibration curve of emission intensity at 655 nm of **RPHS1**.

**Table S1.** The data for standard deviation ( $\sigma$ ) of blank measurement from **Fig. S2**.

| $F_{655 \text{ nm}}$ |          |          |          |          | $\sigma (F)$ |
|----------------------|----------|----------|----------|----------|--------------|
| 21.98836             | 12.4944  | -6.42142 | 23.08372 | -10.1732 | 11.2692      |
| 26.36454             | 4.64577  | 0.04712  | -1.93796 | -10.7151 |              |
| 15.62783             | 1.5738   | -2.54438 | 6.47045  | -5.73408 |              |
| 5.13837              | -1.12713 | 14.5458  | -8.48954 | 4.29032  |              |

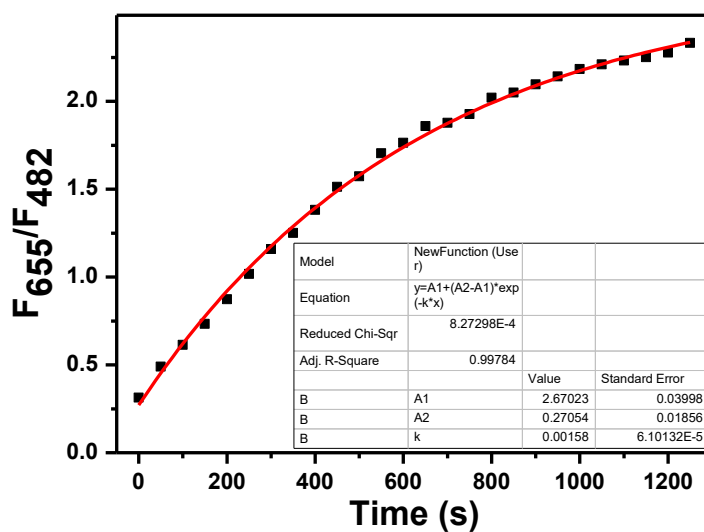

**Fig. S3.** Fluorescence kinetic of **RPHS1** (5  $\mu\text{M}$ ) upon addition of 50  $\mu\text{M}$   $\text{Na}_2\text{S}_2$  in DMSO/ phosphate buffer (3:97, v/v, 10 mM, pH 7.4, 0.4% Tween 80) at room temperature. The data curve is fitted (red line) by a first order reaction scheme (see equation inserted, where A1 and A2 are the final and initial intensity, respectively). The observed pseudo-first-order rate constant  $k_{\text{obs}}$  was determined to be about  $0.0016 \text{ s}^{-1}$ .

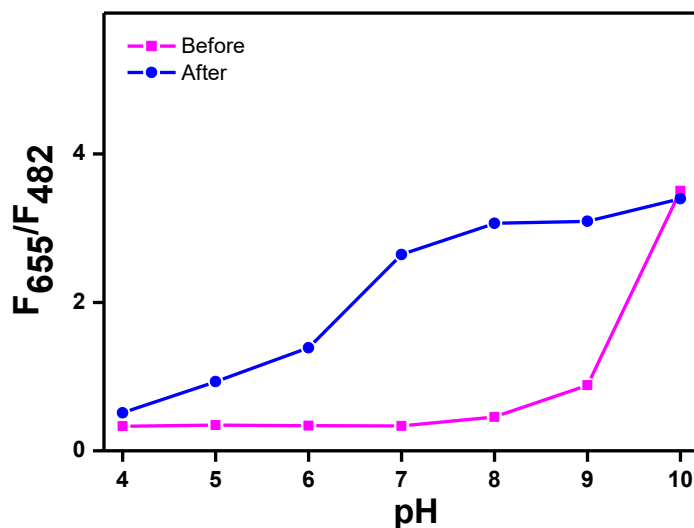

**Fig. S4.** Effects of pH on the fluorescence of **RPHS1** (5  $\mu\text{M}$ ) reacting with  $\text{Na}_2\text{S}_2$  (50  $\mu\text{M}$ ) ( $\lambda_{\text{ex}} = 395 \text{ nm}$ , slit width =  $d_{\text{ex}} = d_{\text{em}} = 2 \text{ nm}$ , PMT voltage = 950 V) in DMSO/ Water (3:97, v/v, 0.4% Tween 80).

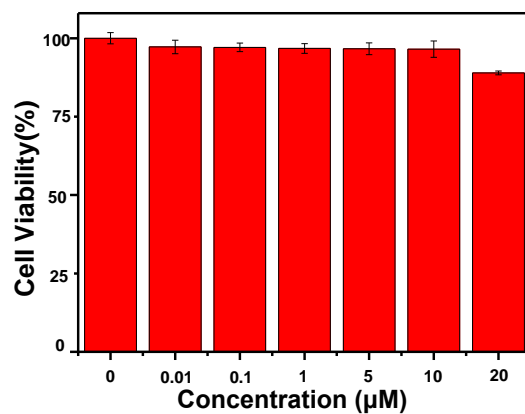

**Fig. S5.** Cell viability of HeLa cells incubated with **RPHS1** at different concentrations.

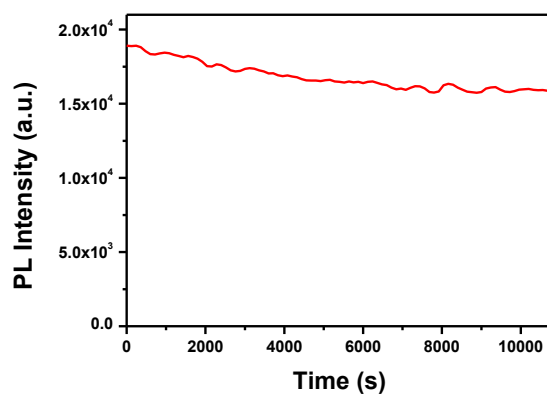

**Fig. S6.** The fluorescence intensity changes of **RPHS1** at 482 nm (5 µM, 3% DMSO, 0.4% Tween 80 in PBS,  $\lambda_{ex}$ =395 nm, slit= 2 nm).

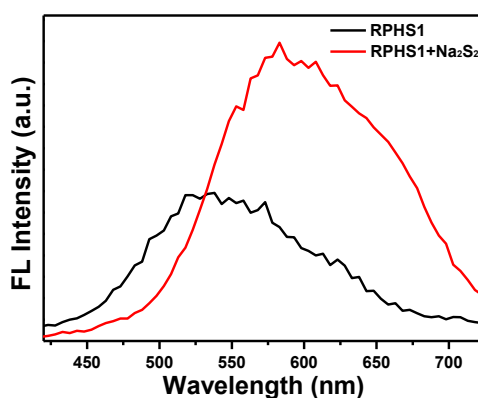

**Fig. S7.** Fluorescence spectra of **RPHS1** (20 µM) before (black line) and after (red line) addition of Na<sub>2</sub>S<sub>2</sub> (200 µM) in living HeLa cells.

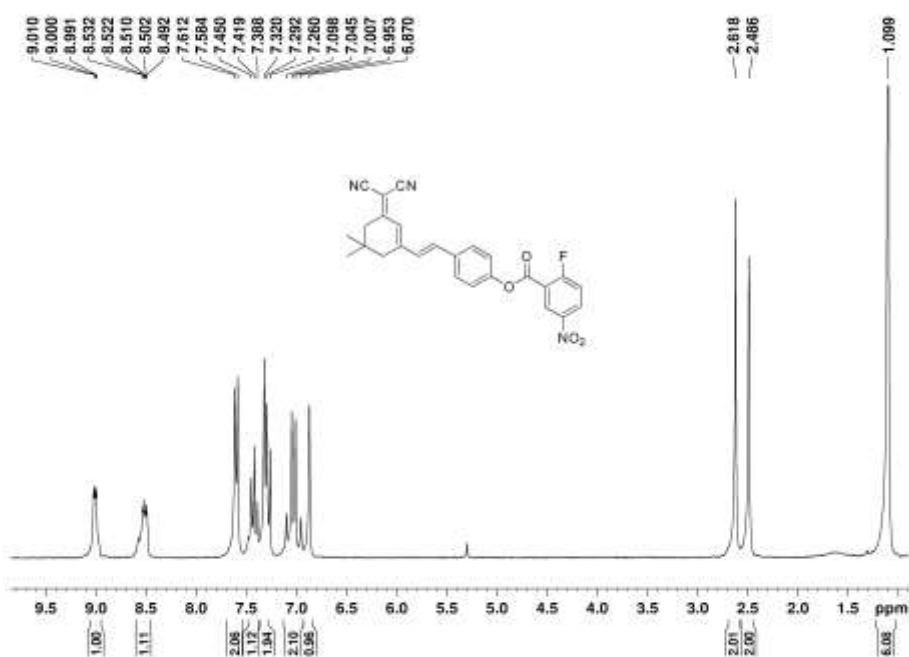

Fig. S8.  $^1\text{H}$  NMR spectrum of RPHS1 in  $\text{CDCl}_3$ .

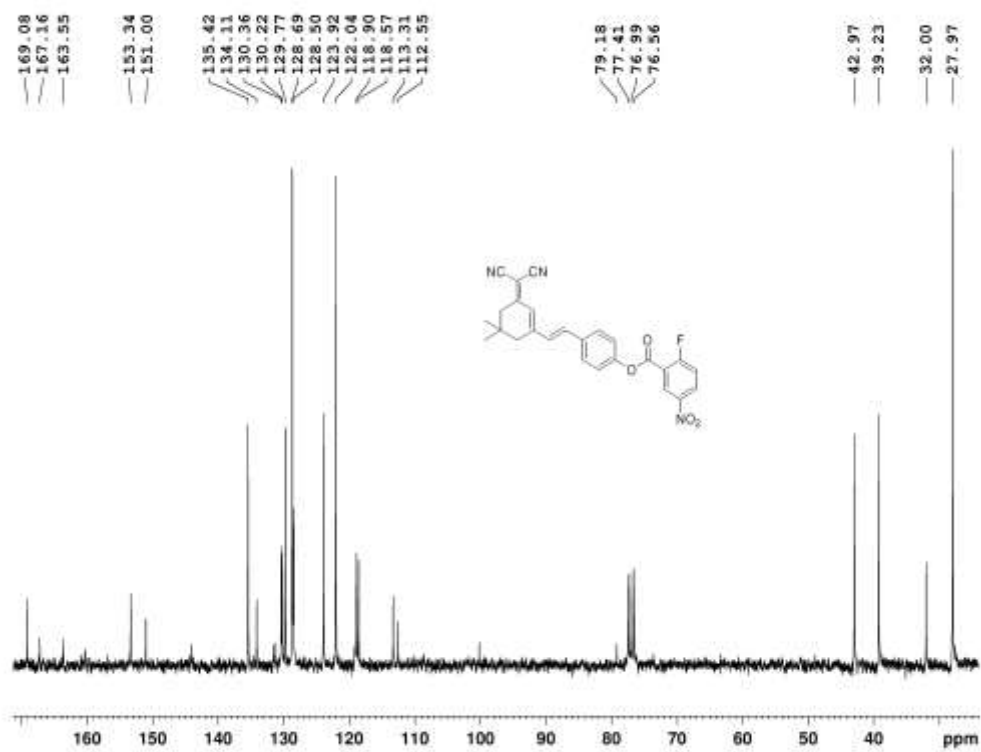

Fig. S9.  $^{13}\text{C}$  NMR spectrum of RPHS1 in  $\text{CDCl}_3$ .

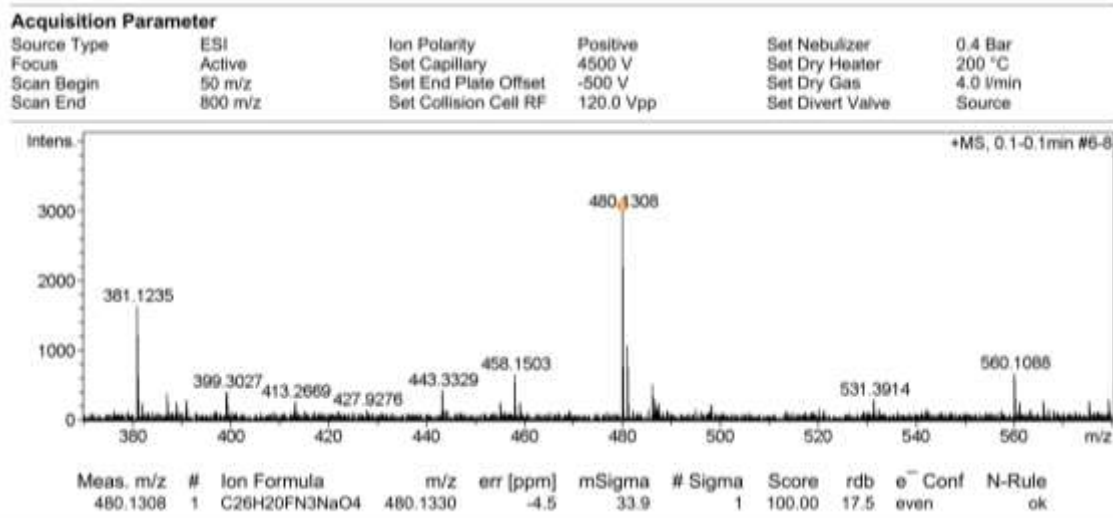

**Fig. S10.** HRMS spectrum of RPHS1.
